# Supplementary material for: Circular RNA has_circ_0067934 is upregulated in esophageal squamous cell carcinoma and promoted proliferation
Source: PubMed Central journal article supplement (PMC5067712; doi:10.1038/srep35576), 2016-10-18
Supplement: srep35576-s1.pdf [file srep35576-s1.pdf]

# Circular RNA has\_circ\_0067934 is upregulated in esophageal squamous cell carcinoma and promoted proliferation

Wenjia Xia , Mantang Qiu, Rui Chen, Siwei Wang, Xuechun Leng, Jie Wang , Youtao Xu, Jingwen Hu, Gaochao Dong, Lin Xu and Rong Yin.

## Supplementary figure 1:

The figure was provided to indicate the site of splice junction, PCR primers, and FISH probes.

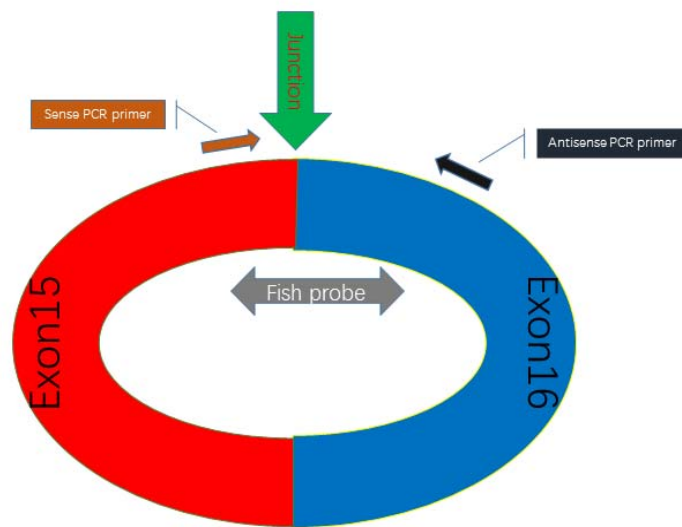

## Supplementary figure 2:

The expression of hsa\_circ\_0067934 and PRKCI by qRT-PCR in a cohort of 26 samples, and the results showed that there was no significant correlation between hsa\_circ\_0067934 and PRKCI

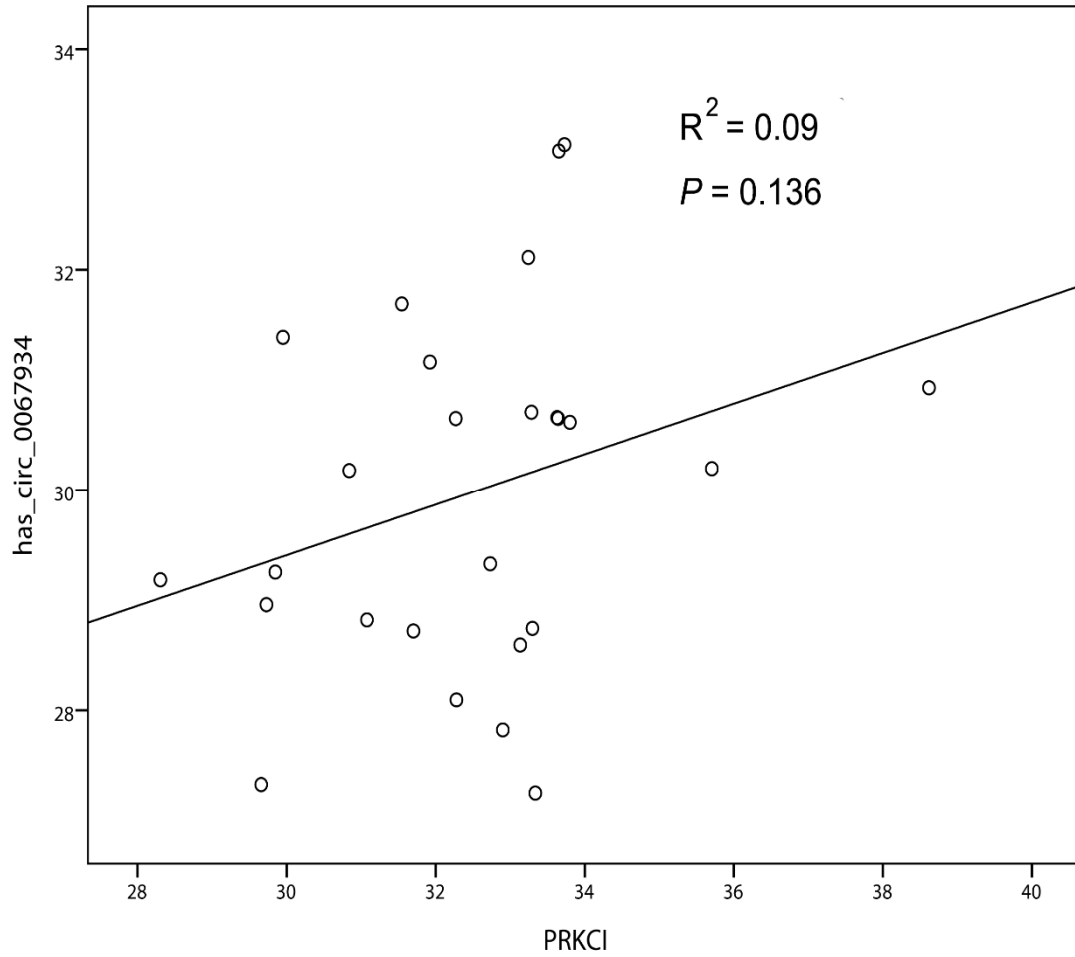

### Supplementary file 3:

Flow cytometric analyses indicate that si-hsa\_circ\_0067934 did not affect cells apoptosis.

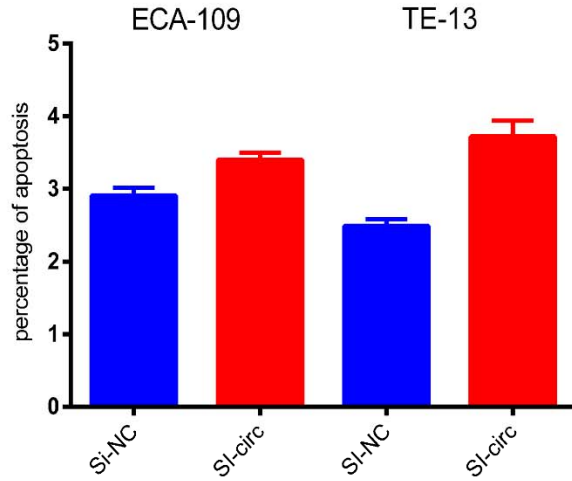

### ECA-109

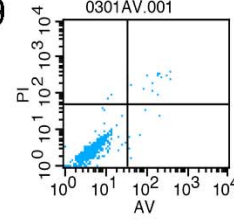

| Si-NC | Quad | % Gated |
|-------|------|---------|
|       | UL   | 0.48    |
|       | UR   | 2.10    |
|       | LL   | 96.61   |
|       | LR   | 0.81    |

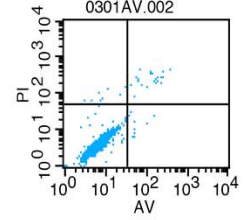

| Si-circ | Quad | % Gated |
|---------|------|---------|
|         | UL   | 0.55    |
|         | UR   | 1.85    |
|         | LL   | 96.27   |
|         | LR   | 1.33    |

### TE-13

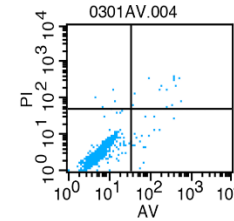

| Si-NC | Quad | % Gated |
|-------|------|---------|
|       | UL   | 0.36    |
|       | UR   | 1.13    |
|       | LL   | 97.15   |
|       | LR   | 1.36    |

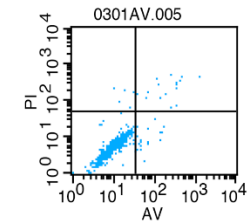

| Si-circ | Quad | % Gated |
|---------|------|---------|
|         | UL   | 0.37    |
|         | UR   | 1.58    |
|         | LL   | 95.88   |
|         | LR   | 2.17    |

**Supplementary file for review only :**

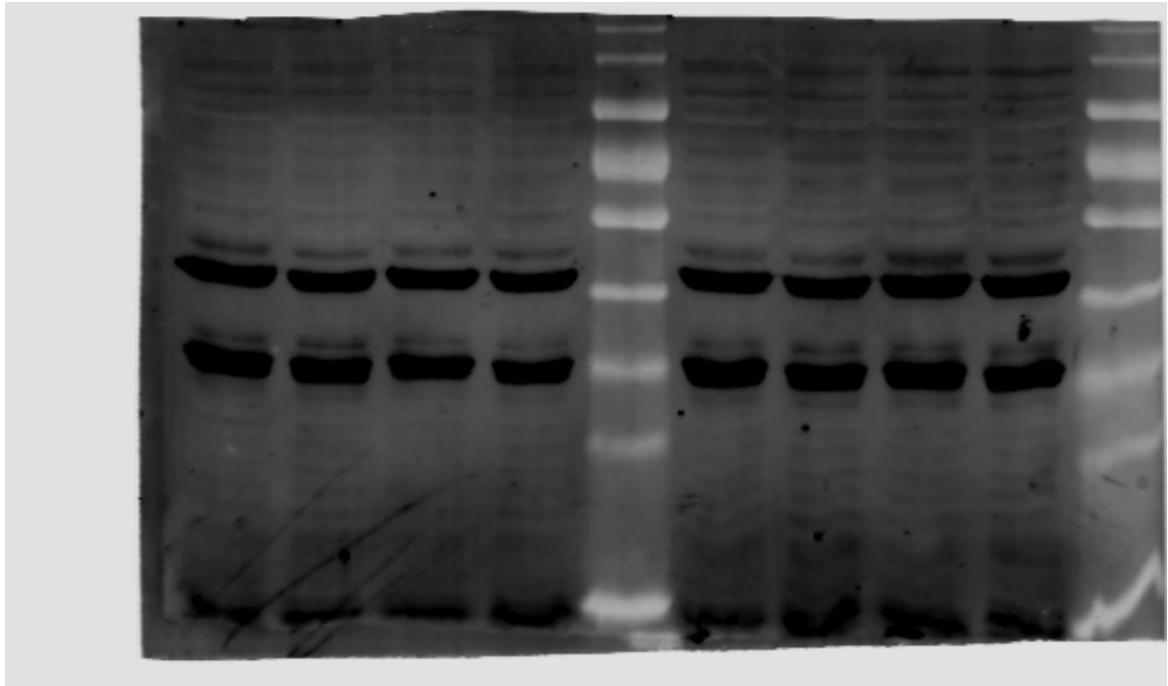

$\beta$ -actin

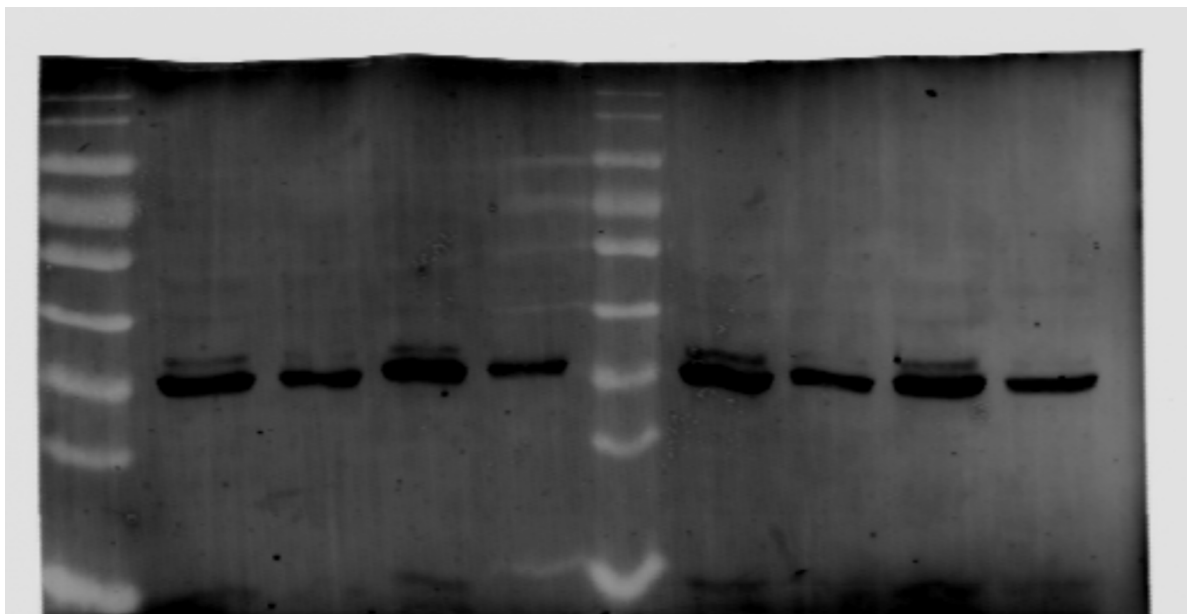

cyclinD
